# Supplementary material for: Factors Associated with COVID-19 Vaccine Hesitancy
Source: PubMed Central journal article supplement (PMC8004673; doi:10.3390/vaccines9030300), 2021-03-22
Supplement: vaccines-09-00300-s001.pdf [file vaccines-09-00300-s001.pdf]

**Table S1.** Odds of delay and refusal for the determinants of vaccine hesitancy, adjusted for gender, age, education and period of questionnaire. OR: odds-ratio, CI: confidence interval.

|                                                                                                    | <i>Wait versus Yes</i> |                     | <i>No versus Yes</i> |                      | <i>No versus Wait</i> |                      |
|----------------------------------------------------------------------------------------------------|------------------------|---------------------|----------------------|----------------------|-----------------------|----------------------|
|                                                                                                    | OR                     | 95% CI              | OR                   | 95% CI               | OR                    | 95% CI               |
| <b>Gender</b> (ref. Male)                                                                          | <b>1.44</b>            | <b>(1.16; 1.78)</b> | 0.91                 | (0.64; 1.31)         | <b>0.63</b>           | <b>(0.45; 0.89)</b>  |
| <b>Age (in years)</b>                                                                              | <b>0.99</b>            | <b>(0.98; 0.99)</b> | <b>0.98</b>          | <b>(0.97; 0.99)</b>  | 0.99                  | (0.98; 1.01)         |
| <b>Education</b> (ref. University)                                                                 |                        |                     |                      |                      |                       |                      |
| No education/Basic                                                                                 | 0.88                   | (0.50; 1.57)        | 2.07                 | (0.92; 4.63)         | <b>2.33</b>           | <b>(1.08; 5.05)</b>  |
| Secondary                                                                                          | 1.23                   | (0.96; 1.58)        | <b>1.78</b>          | <b>(1.19; 2.66)</b>  | 1.44                  | (0.99; 2.10)         |
| <b>Monthly household income</b> (ref. <650€)                                                       |                        |                     |                      |                      |                       |                      |
| 651-1000€                                                                                          | 1.00                   | (0.58; 1.72)        | 0.69                 | (0.27; 1.71)         | 0.69                  | (0.29; 1.61)         |
| 1001-1500€                                                                                         | 0.98                   | (0.59; 1.64)        | 1.10                 | (0.49; 2.48)         | 1.11                  | (0.52; 2.38)         |
| 1501-2000€                                                                                         | 0.95                   | (0.57; 1.61)        | 1.01                 | (0.43; 2.35)         | 1.06                  | (0.48; 2.33)         |
| 2001-2500€                                                                                         | 1.12                   | (0.65; 1.91)        | 1.29                 | (0.54; 3.08)         | 1.15                  | (0.51; 2.59)         |
| > 2501€                                                                                            | 0.72                   | (0.43; 1.20)        | 0.65                 | (0.27; 1.52)         | 0.90                  | (0.40; 2.02)         |
| <b>Lost of income due to the pandemic</b> (ref. No)                                                | <b>1.26</b>            | <b>(1.02; 1.57)</b> | <b>1.92</b>          | <b>(1.35; 2.74)</b>  | <b>1.52</b>           | <b>(1.09; 2.12)</b>  |
| <b>Occupation</b> (ref. Worker)                                                                    |                        |                     |                      |                      |                       |                      |
| Student                                                                                            | <b>0.51</b>            | <b>(0.31; 0.83)</b> | 0.47                 | (0.19; 1.14)         | 0.93                  | (0.40; 2.18)         |
| Unemployed                                                                                         | 1.12                   | (0.69; 1.83)        | 1.70                 | (0.84; 3.44)         | 1.52                  | (0.80; 2.87)         |
| Retired                                                                                            | 0.77                   | (0.51; 1.18)        | <b>0.19</b>          | <b>(0.05; 0.64)</b>  | <b>0.24</b>           | <b>(0.07; 0.83)</b>  |
| Other                                                                                              | 0.98                   | (0.60; 1.62)        | 0.89                 | (0.38; 2.05)         | 0.90                  | (0.41; 1.98)         |
| <b>Intention of taking the flu vaccine this year</b> (ref. Yes, I take the flu vaccine every year) |                        |                     |                      |                      |                       |                      |
| Yes, I will take the flu vaccine this year                                                         | <b>1.42</b>            | <b>(1.06; 1.88)</b> | 1.04                 | (0.34; 3.20)         | 0.74                  | (0.24; 2.24)         |
| No                                                                                                 | <b>2.33</b>            | <b>(1.84; 2.96)</b> | <b>19.81</b>         | <b>(9.74; 40.30)</b> | <b>8.50</b>           | <b>(4.22; 17.11)</b> |
| <b>Perception of the health status</b> (ref. Very good/Good)                                       |                        |                     |                      |                      |                       |                      |
| Reasonable                                                                                         | 1.00                   | (0.81; 1.23)        | <b>0.59</b>          | <b>(0.40; 0.87)</b>  | <b>0.59</b>           | <b>(0.41; 0.86)</b>  |
| Bad/Very bad                                                                                       | 0.71                   | (0.41; 1.23)        | <b>0.22</b>          | <b>(0.05; 0.95)</b>  | 0.31                  | (0.07; 1.33)         |
| <b>Respiratory disease</b> (ref. No)                                                               | 1.20                   | (0.91; 1.58)        | 1.10                 | (0.68; 1.78)         | 0.91                  | (0.58; 1.44)         |
| <b>Autoimmune disease</b> (ref. No)                                                                | 0.84                   | (0.61; 1.16)        | <b>0.36</b>          | <b>(0.16; 0.81)</b>  | <b>0.43</b>           | <b>(0.20; 0.95)</b>  |
| <b>Number of comorbidities</b> (ref. 0)                                                            |                        |                     |                      |                      |                       |                      |
| 1                                                                                                  | 0.92                   | (0.73; 1.16)        | <b>0.58</b>          | <b>(0.38; 0.87)</b>  | <b>0.63</b>           | <b>(0.42; 0.92)</b>  |
| ≥2                                                                                                 | 0.97                   | (0.71; 1.31)        | <b>0.24</b>          | <b>(0.11; 0.51)</b>  | <b>0.24</b>           | <b>(0.12; 0.52)</b>  |
| <b>Have school-age children</b> (ref. No)                                                          | 1.00                   | (0.82; 1.22)        | <b>1.93</b>          | <b>(1.37; 2.73)</b>  | <b>1.94</b>           | <b>(1.39; 2.69)</b>  |

|                                                                                                               | Wait <i>versus</i> Yes |                     | No <i>versus</i> Yes |                      | No <i>versus</i> Wait |                      |
|---------------------------------------------------------------------------------------------------------------|------------------------|---------------------|----------------------|----------------------|-----------------------|----------------------|
| <b>Confidence in the health services capacity to respond to the pandemic</b> (ref. Very confident)            |                        |                     |                      |                      |                       |                      |
| Confident                                                                                                     | 1.28                   | (0.88; 1.85)        | <b>0.47</b>          | <b>(0.25; 0.89)</b>  | <b>0.37</b>           | <b>(0.20; 0.68)</b>  |
| Not very confident                                                                                            | <b>1.69</b>            | <b>(1.14; 2.51)</b> | 0.92                 | (0.48; 1.76)         | 0.54                  | (0.29; 1.01)         |
| Not confident                                                                                                 | 1.66                   | (0.91; 3.06)        | <b>7.56</b>          | <b>(3.59; 15.92)</b> | <b>4.54</b>           | <b>(2.33; 8.87)</b>  |
| <b>View on the information provided by the health authorities</b> (ref. Clear and understandable)             |                        |                     |                      |                      |                       |                      |
| Unclear and confusing                                                                                         | 1.31                   | (0.97; 1.77)        | <b>2.44</b>          | <b>(1.12; 5.29)</b>  | 1.86                  | (0.87; 3.98)         |
| Inconsistent and contradictory                                                                                | <b>1.50</b>            | <b>(1.12; 1.99)</b> | <b>8.61</b>          | <b>(4.73; 15.68)</b> | <b>5.75</b>           | <b>(3.23; 10.26)</b> |
| <b>Perception of the adequacy of the measures implemented by the Government</b> (ref. Very adequate/adequate) |                        |                     |                      |                      |                       |                      |
| Not very adequate/Not adequate                                                                                | <b>1.40</b>            | <b>(1.15; 1.72)</b> | <b>8.49</b>          | <b>(5.44; 13.25)</b> | <b>6.04</b>           | <b>(3.93; 9.30)</b>  |
| <b>Self-Perceived Risk to get COVID-19 Infection</b> (ref. High)                                              |                        |                     |                      |                      |                       |                      |
| Moderate                                                                                                      | 0.92                   | (0.71; 1.18)        | <b>0.61</b>          | <b>(0.39; 0.96)</b>  | 0.67                  | (0.44; 1.02)         |
| Low/No risk                                                                                                   | 1.09                   | (0.79; 1.49)        | <b>1.98</b>          | <b>(1.23; 3.20)</b>  | <b>1.83</b>           | <b>(1.18; 2.84)</b>  |
| Not sure                                                                                                      | 1.13                   | (0.67; 1.92)        | 0.38                 | (0.11; 1.36)         | 0.34                  | (0.10; 1.16)         |
| <b>Self-Perceived Risk to Develop Severe Disease Following COVID-19 Infection</b> (ref. High)                 |                        |                     |                      |                      |                       |                      |
| Moderate                                                                                                      | <b>1.31</b>            | <b>(1.00; 1.73)</b> | 1.83                 | (0.92; 3.64)         | 1.40                  | (0.71; 2.74)         |
| Low/No risk                                                                                                   | 1.27                   | (0.95; 1.71)        | <b>7.41</b>          | <b>(3.89; 14.11)</b> | <b>5.82</b>           | <b>(3.10; 10.91)</b> |
| Not sure                                                                                                      | <b>1.72</b>            | <b>(1.17; 2.53)</b> | 1.34                 | (0.48; 3.73)         | 0.78                  | (0.29; 2.12)         |
| <b>Frequency of agitation, sadness or anxiety due to the physical distance measures</b> (ref. Never)          |                        |                     |                      |                      |                       |                      |
| Some days                                                                                                     | <b>0.74</b>            | <b>(0.57; 0.96)</b> | <b>0.49</b>          | <b>(0.31; 0.78)</b>  | 0.67                  | (0.44; 1.03)         |
| Almost every day                                                                                              | 0.74                   | (0.53; 1.04)        | 0.82                 | (0.47; 1.42)         | 1.10                  | (0.66; 1.85)         |
| Every day                                                                                                     | 0.75                   | (0.48; 1.18)        | 1.50                 | (0.81; 2.78)         | <b>2.00</b>           | <b>(1.13; 3.51)</b>  |

|                                                                                                     | Wait <i>versus</i> Yes |              | No <i>versus</i> Yes |                 | No <i>versus</i> Wait |               |
|-----------------------------------------------------------------------------------------------------|------------------------|--------------|----------------------|-----------------|-----------------------|---------------|
|                                                                                                     | OR                     | 95% CI       | OR                   | 95% CI          | OR                    | 95% CI        |
| <b>Confidence in the COVID-19 vaccines that are being developed</b> (ref. Very confident/Confident) | 9.94                   | (7.48; 13.2) | 109.69               | (57.38; 209.69) | 11.04                 | (6.01; 20.28) |
| <b>Period of questionnaire</b> (ref. After)                                                         | 2.05                   | (1.68; 2.50) | 4.69                 | (3.21; 6.86)    | 2.29                  | (1.59; 3.30)  |

**Table S2.** Odds of delay and refusal for the determinants of vaccine hesitancy for individuals without education or with basic or secondary education, adjusted for gender, age, education and period of questionnaire. OR: odds-ratio, CI: confidence interval.

|                                                                                                    | Wait <i>versus</i> Yes  |                     | No <i>versus</i> Yes    |                       | No <i>versus</i> Wait   |                       |
|----------------------------------------------------------------------------------------------------|-------------------------|---------------------|-------------------------|-----------------------|-------------------------|-----------------------|
|                                                                                                    | Multivariate regression |                     | Multivariate regression |                       | Multivariate regression |                       |
|                                                                                                    | OR                      | 95% CI              | OR                      | 95% CI                | OR                      | 95% CI                |
| <b>Gender</b> (ref. Male)                                                                          | 0.98                    | (0.63; 1.52)        | 0.55                    | (0.29; 1.06)          | 0.56                    | (0.31; 1.03)          |
| <b>Age (in years)</b>                                                                              | 0.99                    | (0.97; 1.01)        | 0.98                    | (0.95; 1.00)          | 0.99                    | (0.96; 1.01)          |
| <b>Monthly household income</b> (ref. <650€)                                                       |                         |                     |                         |                       |                         |                       |
| 651-1000€                                                                                          | <b>0.42</b>             | <b>(0.18; 0.99)</b> | <b>0.20</b>             | <b>(0.05; 0.74)</b>   | 0.47                    | (0.15; 1.50)          |
| 1001-1500€                                                                                         | 0.53                    | (0.23; 1.25)        | 0.66                    | (0.20; 2.16)          | 1.24                    | (0.46; 3.35)          |
| 1501-2000€                                                                                         | <b>0.28</b>             | <b>(0.12; 0.68)</b> | 0.58                    | (0.17; 1.97)          | 2.07                    | (0.72; 5.98)          |
| 2001-2500€                                                                                         | 0.72                    | (0.26; 2.03)        | 0.15                    | (0.01; 1.50)          | 0.21                    | (0.02; 1.81)          |
| > 2501€                                                                                            | <b>0.19</b>             | <b>(0.07; 0.52)</b> | <b>0.15</b>             | <b>(0.03; 0.93)</b>   | 0.82                    | (0.15; 4.58)          |
| <b>Lost of income due to the pandemic</b> (ref. No)                                                | 1.19                    | (0.77; 1.84)        | 1.57                    | (0.81; 3.05)          | 1.32                    | (0.72; 2.43)          |
| <b>Occupation</b> (ref. Worker)                                                                    |                         |                     |                         |                       |                         |                       |
| Student                                                                                            | 0.77                    | (0.28; 2.11)        | 0.64                    | (0.13; 3.16)          | 0.83                    | (0.19; 3.64)          |
| Unemployed                                                                                         | 1.42                    | (0.65; 3.11)        | 2.05                    | (0.72; 5.85)          | 1.45                    | (0.59; 3.57)          |
| Retired                                                                                            | 1.04                    | (0.49; 2.20)        | 0.15                    | (0.02; 1.31)          | 0.14                    | (0.02; 1.22)          |
| Other                                                                                              | 0.84                    | (0.36; 1.98)        | 1.09                    | (0.33; 3.62)          | 1.30                    | (0.43; 3.93)          |
| <b>Intention of taking the flu vaccine this year</b> (ref. Yes, I take the flu vaccine every year) |                         |                     |                         |                       |                         |                       |
| Yes, I will take the flu vaccine this year                                                         | 0.87                    | (0.46; 1.63)        | 1.97                    | (0.12; 33.18)         | 2.28                    | (0.14; 38.10)         |
| No                                                                                                 | <b>3.03</b>             | <b>(1.86; 4.96)</b> | <b>65.95</b>            | <b>(8.64; 503.62)</b> | <b>21.73</b>            | <b>(2.90; 162.76)</b> |
| <b>Perception of the health status</b> (ref. Very good/Good)                                       |                         |                     |                         |                       |                         |                       |
| Reasonable                                                                                         | 0.78                    | (0.51; 1.20)        | 0.59                    | (0.30; 1.16)          | 0.76                    | (0.41; 1.41)          |
| Bad/Very bad                                                                                       | <b>0.42</b>             | <b>(0.18; 0.94)</b> | <b>0.11</b>             | <b>(0.01; 0.92)</b>   | 0.27                    | (0.03; 2.19)          |
| <b>Respiratory disease</b> (ref. No)                                                               | 0.94                    | (0.54; 1.65)        | 0.90                    | (0.36; 2.21)          | 0.95                    | (0.41; 2.22)          |
| <b>Autoimmune disease</b> (ref. No)                                                                | <b>0.42</b>             | <b>(0.22; 0.81)</b> | <b>0.10</b>             | <b>(0.01; 0.80)</b>   | 0.25                    | (0.03; 1.91)          |
| <b>Number of comorbidities</b> (ref. 0)                                                            |                         |                     |                         |                       |                         |                       |

|                                                                                                               | <i>Wait versus Yes</i> |                     | <i>No versus Yes</i> |                      | <i>No versus Wait</i> |                      |
|---------------------------------------------------------------------------------------------------------------|------------------------|---------------------|----------------------|----------------------|-----------------------|----------------------|
| 1                                                                                                             | 1.06                   | (0.66; 1.69)        | 0.59                 | (0.28; 1.25)         | 0.56                  | (0.28; 1.12)         |
| ≥2                                                                                                            | 0.94                   | (0.52; 1.71)        | <b>0.24</b>          | <b>(0.06; 0.87)</b>  | <b>0.25</b>           | <b>(0.07; 0.89)</b>  |
| <b>Have school-age children</b> (ref. No)                                                                     | 0.88                   | (0.57; 1.35)        | 1.36                 | (0.71; 2.63)         | 1.54                  | (0.84; 2.83)         |
| <b>Confidence in the health services capacity to respond to the pandemic</b> (ref. Very confident)            |                        |                     |                      |                      |                       |                      |
| Confident                                                                                                     | 0.91                   | (0.44; 1.88)        | 0.56                 | (0.17; 1.86)         | 0.62                  | (0.20; 1.88)         |
| Not very confident                                                                                            | 0.94                   | (0.43; 2.07)        | 0.74                 | (0.20; 2.67)         | 0.78                  | (0.24; 2.57)         |
| Not confident                                                                                                 | 0.40                   | (0.12; 1.34)        | <b>6.30</b>          | <b>(1.61; 24.69)</b> | <b>15.67</b>          | <b>(4.17; 58.93)</b> |
| <b>View on the information provided by the health authorities</b> (ref. Clear and understandable)             |                        |                     |                      |                      |                       |                      |
| Unclear and confusing                                                                                         | 1.25                   | (0.59; 2.65)        | <b>7.00</b>          | <b>(1.57; 31.27)</b> | <b>5.61</b>           | <b>(1.34; 23.39)</b> |
| Inconsistent and contradictory                                                                                | 1.26                   | (0.68; 2.35)        | <b>12.81</b>         | <b>(3.53; 46.44)</b> | <b>10.15</b>          | <b>(2.95; 34.95)</b> |
| <b>Perception of the adequacy of the measures implemented by the Government</b> (ref. Very adequate/adequate) |                        |                     |                      |                      |                       |                      |
| Not very adequate/Not adequate                                                                                | 1.24                   | (0.81; 1.88)        | <b>14.28</b>         | <b>(5.23; 38.97)</b> | <b>11.55</b>          | <b>(4.37; 30.52)</b> |
| <b>Self-Perceived Risk to get COVID-19 Infection</b> (ref. High)                                              |                        |                     |                      |                      |                       |                      |
| Moderate                                                                                                      | <b>1.78</b>            | <b>(1.06; 2.97)</b> | 1.11                 | (0.44; 2.82)         | 0.63                  | (0.26; 1.54)         |
| Low/No risk                                                                                                   | <b>2.38</b>            | <b>(1.24; 4.56)</b> | <b>7.03</b>          | <b>(2.71; 18.21)</b> | <b>2.96</b>           | <b>(1.24; 7.06)</b>  |
| Not sure                                                                                                      | 1.18                   | (0.50; 2.78)        | 0.84                 | (0.15; 4.66)         | 0.71                  | (0.13; 3.78)         |
| <b>Self-Perceived Risk to Develop Severe Disease Following COVID-19 Infection</b> (ref. High)                 |                        |                     |                      |                      |                       |                      |
| Moderate                                                                                                      | <b>1.74</b>            | <b>(1.04; 2.94)</b> | 1.99                 | (0.61; 6.50)         | 1.14                  | (0.36; 3.64)         |
| Low/No risk                                                                                                   | <b>2.80</b>            | <b>(1.52; 5.18)</b> | <b>15.06</b>         | <b>(4.95; 45.82)</b> | <b>5.37</b>           | <b>(1.87; 15.39)</b> |
| Not sure                                                                                                      | <b>2.50</b>            | <b>(1.22; 5.15)</b> | 2.58                 | (0.53; 12.48)        | 1.03                  | (0.23; 4.69)         |
| <b>Frequency of agitation, sadness or anxiety due to the physical distance measures</b> (ref. Never)          |                        |                     |                      |                      |                       |                      |
| Some days                                                                                                     | 0.67                   | (0.39; 1.16)        | <b>0.34</b>          | <b>(0.15; 0.78)</b>  | 0.51                  | (0.24; 1.08)         |

|                                                                                              | Wait versus Yes |                      | No versus Yes |                        | No versus Wait |                       |
|----------------------------------------------------------------------------------------------|-----------------|----------------------|---------------|------------------------|----------------|-----------------------|
|                                                                                              | OR              | 95% CI               | OR            | 95% CI                 | OR             | 95% CI                |
| Almost every day                                                                             | 0.94            | (0.45; 1.97)         | 0.60          | (0.21; 1.74)           | 0.64           | (0.24; 1.66)          |
| Every day                                                                                    | 1.08            | (0.47; 2.48)         | 0.75          | (0.24; 2.37)           | 0.70           | (0.26; 1.90)          |
| Confidence in the COVID-19 vaccines that are being developed (ref. Very confident/Confident) | <b>7.37</b>     | <b>(4.27; 12.74)</b> | <b>182.46</b> | <b>(39.38; 845.33)</b> | <b>24.76</b>   | <b>(5.67; 108.01)</b> |
| Period of questionnaire (ref. After)                                                         | <b>1.73</b>     | <b>(1.15; 2.61)</b>  | <b>6.86</b>   | <b>(3.20; 14.70)</b>   | <b>3.96</b>    | <b>(1.91; 8.22)</b>   |

**Table S3.** Odds of delay and refusal for the determinants of vaccine hesitancy for individuals with an university degree, adjusted for gender, age, education and period of questionnaire. OR: odds-ratio, CI: confidence interval.

|                                                                                             | Wait versus Yes         |                     | No versus Yes           |                      | No versus Wait          |                     |
|---------------------------------------------------------------------------------------------|-------------------------|---------------------|-------------------------|----------------------|-------------------------|---------------------|
|                                                                                             | Multivariate regression |                     | Multivariate regression |                      | Multivariate regression |                     |
|                                                                                             | OR                      | 95% CI              | OR                      | 95% CI               | OR                      | 95% CI              |
| Gender (ref. Male)                                                                          | <b>1.63</b>             | <b>(1.27; 2.09)</b> | 1.10                    | (0.71; 1.70)         | 0.68                    | (0.44; 1.03)        |
| Age (in years)                                                                              | <b>0.98</b>             | <b>(0.98; 0.99)</b> | 0.98                    | (0.97; 1.00)         | 1.00                    | (0.98; 1.01)        |
| Monthly household income (ref. <650€)                                                       |                         |                     |                         |                      |                         |                     |
| 651-1000€                                                                                   | <b>2.25</b>             | <b>(1.07; 4.75)</b> | 2.11                    | (0.50; 8.84)         | 0.93                    | (0.23; 3.79)        |
| 1001-1500€                                                                                  | 1.82                    | (0.93; 3.58)        | 1.96                    | (0.53; 7.28)         | 1.07                    | (0.29; 3.93)        |
| 1501-2000€                                                                                  | <b>2.17</b>             | <b>(1.09; 4.31)</b> | 1.76                    | (0.46; 6.79)         | 0.81                    | (0.21; 3.07)        |
| 2001-2500€                                                                                  | <b>2.13</b>             | <b>(1.07; 4.24)</b> | 2.99                    | (0.8; 11.14)         | 1.40                    | (0.38; 5.13)        |
| > 2501€                                                                                     | 1.55                    | (0.80; 3.01)        | 1.42                    | (0.39; 5.21)         | 0.91                    | (0.25; 3.31)        |
| Lost of income due to the pandemic (ref. No)                                                | <b>1.29</b>             | <b>(1.01; 1.66)</b> | <b>2.08</b>             | <b>(1.37; 3.16)</b>  | <b>1.61</b>             | <b>(1.09; 2.38)</b> |
| Occupation (ref. Worker)                                                                    |                         |                     |                         |                      |                         |                     |
| Student                                                                                     | <b>0.44</b>             | <b>(0.24; 0.80)</b> | 0.41                    | (0.13; 1.29)         | 0.93                    | (0.30; 2.84)        |
| Unemployed                                                                                  | 1.00                    | (0.53; 1.86)        | 1.55                    | (0.58; 4.12)         | 1.56                    | (0.62; 3.89)        |
| Retired                                                                                     | <b>0.57</b>             | <b>(0.33; 0.97)</b> | <b>0.22</b>             | <b>(0.05; 0.99)</b>  | 0.38                    | (0.08; 1.75)        |
| Other                                                                                       | 1.12                    | (0.61; 2.08)        | 0.70                    | (0.20; 2.49)         | 0.63                    | (0.19; 2.10)        |
| Intention of taking the flu vaccine this year (ref. Yes, I take the flu vaccine every year) |                         |                     |                         |                      |                         |                     |
| Yes, I will take the flu vaccine this year                                                  | <b>1.61</b>             | <b>(1.16; 2.22)</b> | 0.91                    | (0.27; 3.11)         | 0.57                    | (0.17; 1.92)        |
| No                                                                                          | <b>2.21</b>             | <b>(1.68; 2.90)</b> | <b>14.54</b>            | <b>(6.76; 31.26)</b> | <b>6.59</b>             | <b>(3.1; 14.02)</b> |
| Perception of the health status (ref. Very good/Good)                                       |                         |                     |                         |                      |                         |                     |
| Reasonable                                                                                  | 1.09                    | (0.85; 1.38)        | <b>0.58</b>             | <b>(0.36; 0.93)</b>  | <b>0.53</b>             | <b>(0.33; 0.84)</b> |
| Bad/Very bad                                                                                | 0.99                    | (0.46; 2.14)        | 0.43                    | (0.05; 3.37)         | 0.43                    | (0.06; 3.35)        |
| Respiratory disease (ref. No)                                                               | 1.31                    | (0.96; 1.80)        | 1.18                    | (0.66; 2.08)         | 0.90                    | (0.52; 1.54)        |
| Autoimmune disease (ref. No)                                                                | 1.07                    | (0.74; 1.56)        | 0.53                    | (0.22; 1.28)         | 0.49                    | (0.21; 1.16)        |

|                                                                                                               | <i>Wait versus Yes</i> |                     | <i>No versus Yes</i> |                      | <i>No versus Wait</i> |                      |
|---------------------------------------------------------------------------------------------------------------|------------------------|---------------------|----------------------|----------------------|-----------------------|----------------------|
| <b>Number of comorbidities</b><br>(ref. 0)                                                                    |                        |                     |                      |                      |                       |                      |
| 1                                                                                                             | 0.90                   | (0.69; 1.17)        | <b>0.57</b>          | <b>(0.35; 0.94)</b>  | 0.64                  | (0.40; 1.03)         |
| ≥2                                                                                                            | 0.99                   | (0.70; 1.41)        | <b>0.23</b>          | <b>(0.09; 0.61)</b>  | <b>0.23</b>           | <b>(0.09; 0.60)</b>  |
| <b>Have school-age children</b> (ref. No)                                                                     | 1.06                   | (0.84; 1.33)        | <b>2.18</b>          | <b>(1.44; 3.29)</b>  | <b>2.06</b>           | <b>(1.39; 3.05)</b>  |
| <b>Confidence in the health services capacity to respond to the pandemic</b><br>(ref. Very confident)         |                        |                     |                      |                      |                       |                      |
| Confident                                                                                                     | 1.46                   | (0.95; 2.26)        | <b>0.44</b>          | <b>(0.21; 0.91)</b>  | <b>0.30</b>           | <b>(0.14; 0.62)</b>  |
| Not very confident                                                                                            | <b>2.08</b>            | <b>(1.31; 3.30)</b> | 0.97                 | (0.46; 2.05)         | <b>0.47</b>           | <b>(0.22; 0.97)</b>  |
| Not confident                                                                                                 | <b>2.73</b>            | <b>(1.31; 5.67)</b> | 8.21                 | <b>(3.35; 20.13)</b> | <b>3.01</b>           | <b>(1.36; 6.65)</b>  |
| <b>View on the information provided by the health authorities</b><br>(ref. Clear and understandable)          |                        |                     |                      |                      |                       |                      |
| Unclear and confusing                                                                                         | 1.33                   | (0.96; 1.86)        | 1.54                 | (0.60; 3.95)         | 1.15                  | (0.45; 2.93)         |
| Inconsistent and contradictory                                                                                | <b>1.56</b>            | <b>(1.13; 2.15)</b> | <b>7.50</b>          | <b>(3.82; 14.73)</b> | <b>4.82</b>           | <b>(2.50; 9.28)</b>  |
| <b>Perception of the adequacy of the measures implemented by the Government</b> (ref. Very adequate/adequate) |                        |                     |                      |                      |                       |                      |
| Not very adequate/Not adequate                                                                                | <b>1.46</b>            | <b>(1.16; 1.84)</b> | <b>7.29</b>          | <b>(4.41; 12.03)</b> | <b>4.99</b>           | <b>(3.07; 8.10)</b>  |
| <b>Self-Perceived Risk to get COVID-19 Infection</b> (ref. High)                                              |                        |                     |                      |                      |                       |                      |
| Moderate                                                                                                      | 0.75                   | (0.56; 1.00)        | <b>0.50</b>          | <b>(0.30; 0.82)</b>  | 0.66                  | (0.41; 1.07)         |
| Low/No risk                                                                                                   | 0.86                   | (0.60; 1.24)        | 1.18                 | (0.67; 2.08)         | 1.37                  | (0.81; 2.32)         |
| Not sure                                                                                                      | 1.26                   | (0.63; 2.52)        | 0.24                 | (0.03; 1.95)         | 0.19                  | (0.03; 1.47)         |
| <b>Self-Perceived Risk to Develop Severe Disease Following COVID-19 Infection</b> (ref. High)                 |                        |                     |                      |                      |                       |                      |
| Moderate                                                                                                      | 1.13                   | (0.82; 1.58)        | 1.61                 | (0.69; 3.75)         | 1.42                  | (0.62; 3.25)         |
| Low/No risk                                                                                                   | 0.97                   | (0.69; 1.37)        | <b>5.34</b>          | <b>(2.41; 11.85)</b> | <b>5.48</b>           | <b>(2.51; 11.97)</b> |
| Not sure                                                                                                      | 1.40                   | (0.88; 2.22)        | 0.88                 | (0.22; 3.51)         | 0.63                  | (0.16; 2.46)         |
| <b>Frequency of agitation, sadness or anxiety due to the physical distance</b>                                |                        |                     |                      |                      |                       |                      |

| measures (ref. Never)                                                                               | Wait versus Yes |                      | No versus Yes |                        | No versus Wait |                      |
|-----------------------------------------------------------------------------------------------------|-----------------|----------------------|---------------|------------------------|----------------|----------------------|
|                                                                                                     | OR              | 95% CI               | OR            | 95% CI                 | OR             | 95% CI               |
| Some days                                                                                           | 0.75            | (0.55; 1.02)         | 0.58          | (0.33; 1.02)           | 0.78           | (0.46; 1.32)         |
| Almost every day                                                                                    | 0.69            | (0.47; 1.02)         | 0.95          | (0.49; 1.85)           | 1.38           | (0.74; 2.58)         |
| Every day                                                                                           | 0.62            | (0.36; 1.06)         | <b>2.12</b>   | <b>(1.01; 4.45)</b>    | <b>3.42</b>    | <b>(1.71; 6.84)</b>  |
| <b>Confidence in the COVID-19 vaccines that are being developed</b> (ref. Very confident/Confident) | <b>11.55</b>    | <b>(8.24; 16.20)</b> | <b>102.07</b> | <b>(49.55; 210.25)</b> | <b>8.84</b>    | <b>(4.52; 17.26)</b> |
| <b>Period of questionnaire</b> (ref. After)                                                         | <b>2.15</b>     | <b>(1.71; 2.69)</b>  | <b>4.00</b>   | <b>(2.58; 6.20)</b>    | <b>1.86</b>    | <b>(1.22; 2.85)</b>  |

**Table S4.** Crude odds of delay and refusal for the determinants of vaccine hesitancy. OR: odds-ratio, CI: confidence interval.

|                                                                                                    | Wait vs Yes |                     | No vs Yes    |                      | No vs Wait  |                      |
|----------------------------------------------------------------------------------------------------|-------------|---------------------|--------------|----------------------|-------------|----------------------|
|                                                                                                    | OR          | 95% CI              | OR           | 95% CI               | OR          | 95% CI               |
| <b>Gender</b> (ref. Male)                                                                          | <b>1.39</b> | <b>(1.13; 1.72)</b> | 0.83         | (0.59; 1.17)         | <b>0.59</b> | <b>(0.43; 0.83)</b>  |
| <b>Age (in years)</b>                                                                              | <b>0.98</b> | <b>(0.98; 0.99)</b> | 0.98         | (0.97; 1.00)         | 1.00        | (0.98; 1.01)         |
| <b>Education</b> (ref. University)                                                                 |             |                     |              |                      |             |                      |
| No education/Basic                                                                                 | 0.76        | (0.43; 1.32)        | 1.83         | (0.86; 3.94)         | <b>2.43</b> | <b>(1.15; 5.13)</b>  |
| Secondary                                                                                          | 1.12        | (0.88; 1.43)        | <b>1.60</b>  | <b>(1.09; 2.37)</b>  | 1.43        | (0.99; 2.06)         |
| <b>Monthly household income</b> (ref. <650€)                                                       |             |                     |              |                      |             |                      |
| 651-1000€                                                                                          | 1.00        | (0.59; 1.70)        | 0.59         | (0.24; 1.44)         | 0.59        | (0.26; 1.36)         |
| 1001-1500€                                                                                         | 0.86        | (0.52; 1.40)        | 0.74         | (0.34; 1.62)         | 0.87        | (0.42; 1.80)         |
| 1501-2000€                                                                                         | 0.85        | (0.51; 1.40)        | 0.69         | (0.31; 1.55)         | 0.81        | (0.38; 1.74)         |
| 2001-2500€                                                                                         | 0.99        | (0.59; 1.66)        | 0.80         | (0.35; 1.83)         | 0.81        | (0.37; 1.75)         |
| > 2501€                                                                                            | <b>0.58</b> | <b>(0.36; 0.94)</b> | <b>0.40</b>  | <b>(0.18; 0.87)</b>  | 0.68        | (0.32; 1.44)         |
| <b>Lost of income due to the pandemic</b> (ref. No)                                                | <b>1.31</b> | <b>(1.06; 1.62)</b> | <b>2.04</b>  | <b>(1.44; 2.87)</b>  | <b>1.56</b> | <b>(1.12; 2.15)</b>  |
| <b>Occupation</b> (ref. Worker)                                                                    |             |                     |              |                      |             |                      |
| Student                                                                                            | 0.77        | (0.50; 1.17)        | 0.72         | (0.33; 1.56)         | 0.94        | (0.44; 2.01)         |
| Unemployed                                                                                         | 1.16        | (0.72; 1.86)        | 1.86         | (0.95; 3.63)         | 1.61        | (0.87; 2.97)         |
| Retired                                                                                            | <b>0.52</b> | <b>(0.36; 0.74)</b> | <b>0.15</b>  | <b>(0.05; 0.47)</b>  | <b>0.28</b> | <b>(0.09; 0.92)</b>  |
| Other                                                                                              | 1.07        | (0.66; 1.73)        | 1.06         | (0.47; 2.38)         | 0.99        | (0.46; 2.14)         |
| <b>Intention of taking the flu vaccine this year</b> (ref. Yes, I take the flu vaccine every year) |             |                     |              |                      |             |                      |
| Yes, I will take the flu vaccine this year                                                         | <b>1.58</b> | <b>(1.20; 2.08)</b> | 1.11         | (0.37; 3.38)         | 0.71        | (0.24; 2.16)         |
| No                                                                                                 | <b>2.40</b> | <b>(1.92; 3.01)</b> | <b>18.29</b> | <b>(9.16; 36.53)</b> | <b>7.66</b> | <b>(3.84; 15.24)</b> |
| <b>Perception of the health status</b> (ref. Very good/Good)                                       |             |                     |              |                      |             |                      |
| Reasonable                                                                                         | 0.95        | (0.78; 1.16)        | <b>0.56</b>  | <b>(0.39; 0.82)</b>  | <b>0.59</b> | <b>(0.42; 0.85)</b>  |

|                                                                                                                                                                 | Wait vs Yes |                     | No vs Yes   |                      | No vs Wait  |                     |
|-----------------------------------------------------------------------------------------------------------------------------------------------------------------|-------------|---------------------|-------------|----------------------|-------------|---------------------|
| Bad/Very bad                                                                                                                                                    | <b>0.57</b> | <b>(0.34; 0.97)</b> | <b>0.21</b> | <b>(0.05; 0.88)</b>  | 0.36        | (0.08; 1.53)        |
| <b>Respiratory dis-</b><br><b>ease</b> (ref. No)                                                                                                                | 1.17        | (0.90; 1.53)        | 1.02        | (0.64; 1.64)         | 0.87        | (0.56; 1.37)        |
| <b>Autoimmune dis-</b><br><b>ease</b> (ref. No)                                                                                                                 | 0.85        | (0.63; 1.16)        | <b>0.32</b> | <b>(0.15; 0.72)</b>  | <b>0.38</b> | <b>(0.17; 0.83)</b> |
| <b>Number of</b><br><b>comorbidities</b><br>(ref. 0)                                                                                                            |             |                     |             |                      |             |                     |
| 1                                                                                                                                                               | 0.87        | (0.70; 1.08)        | <b>0.58</b> | <b>(0.39; 0.85)</b>  | <b>0.66</b> | <b>(0.46; 0.96)</b> |
| ≥2                                                                                                                                                              | 0.85        | (0.64; 1.13)        | <b>0.23</b> | <b>(0.11; 0.48)</b>  | <b>0.27</b> | <b>(0.13; 0.56)</b> |
| <b>Have school-age</b><br><b>children</b> (ref. No)                                                                                                             | 1.04        | (0.85; 1.26)        | <b>1.95</b> | <b>(1.39; 2.73)</b>  | <b>1.88</b> | <b>(1.36; 2.59)</b> |
| <b>Confidence in the</b><br><b>health services ca-</b><br><b>capacity to respond</b><br><b>to the pandemic</b><br>(ref. Very confi-<br>dent)                    |             |                     |             |                      |             |                     |
| Confident                                                                                                                                                       | 1.33        | (0.92; 1.90)        | <b>0.48</b> | <b>(0.26; 0.87)</b>  | <b>0.36</b> | <b>(0.20; 0.65)</b> |
| Not very confi-<br>dent                                                                                                                                         | <b>1.82</b> | <b>(1.24; 2.68)</b> | 1.00        | (0.53; 1.86)         | 0.55        | (0.30; 1.01)        |
| Not confident                                                                                                                                                   | 1.79        | (0.99; 3.25)        | <b>8.63</b> | <b>(4.21; 17.70)</b> | <b>4.82</b> | <b>(2.50; 9.30)</b> |
| <b>View on the in-</b><br><b>formation pro-</b><br><b>vided by the</b><br><b>health authorities</b><br>(ref. Clear and un-<br>derstandable)                     |             |                     |             |                      |             |                     |
| Unclear and con-<br>fusing                                                                                                                                      | 1.24        | (0.93; 1.66)        | <b>2.25</b> | <b>(1.05; 4.83)</b>  | 1.82        | (0.86; 3.86)        |
| Inconsistent and<br>contradictory                                                                                                                               | <b>1.58</b> | <b>(1.20; 2.08)</b> | <b>8.67</b> | <b>(4.85; 15.5)</b>  | <b>5.49</b> | <b>(3.12; 9.65)</b> |
| <b>Perception of the</b><br><b>adequacy of the</b><br><b>measures imple-</b><br><b>mented by the</b><br><b>Government</b> (ref.<br>Very adequate/ad-<br>equate) |             |                     |             |                      |             |                     |
| Not very ade-<br>quate/Not ade-<br>quate                                                                                                                        | <b>1.44</b> | <b>(1.18; 1.76)</b> | 9.34        | <b>(6.02; 14.48)</b> | <b>6.46</b> | <b>(4.22; 9.91)</b> |
| <b>Self-Perceived</b><br><b>Risk to get</b><br><b>COVID-19 Infec-</b><br><b>tion</b> (ref. High)                                                                |             |                     |             |                      |             |                     |
| Moderate                                                                                                                                                        | 0.84        | (0.66; 1.08)        | <b>0.54</b> | <b>(0.35; 0.83)</b>  | <b>0.64</b> | <b>(0.42; 0.97)</b> |
| Low/No risk                                                                                                                                                     | 0.93        | (0.68; 1.25)        | <b>1.58</b> | <b>(1.00; 2.50)</b>  | <b>1.71</b> | <b>(1.11; 2.63)</b> |
| Not sure                                                                                                                                                        | 0.97        | (0.58; 1.63)        | 0.34        | (0.10; 1.17)         | 0.35        | (0.10; 1.17)        |
| <b>Self-Perceived</b><br><b>Risk to Develop</b><br><b>Severe Disease</b><br><b>Following</b><br><b>COVID-19 Infec-</b><br><b>tion</b> (ref. High)               |             |                     |             |                      |             |                     |
| Moderate                                                                                                                                                        | <b>1.34</b> | <b>(1.02; 1.75)</b> | 1.64        | (0.84; 3.21)         | 1.22        | (0.63; 2.38)        |
| Low/No risk                                                                                                                                                     | <b>1.44</b> | <b>(1.10; 1.89)</b> | <b>6.60</b> | <b>(3.60; 12.1)</b>  | <b>4.57</b> | <b>(2.52; 8.31)</b> |



|                                                                                                      | Wait vs Yes  |                      | No vs Yes     |                       | No vs Wait   |                      |
|------------------------------------------------------------------------------------------------------|--------------|----------------------|---------------|-----------------------|--------------|----------------------|
|                                                                                                      | OR           | 95% CI               | OR            | 95% CI                | OR           | 95% CI               |
| Not sure                                                                                             | 1.77         | (1.21; 2.58)         | 1.24          | (0.45; 3.42)          | 0.70         | (0.26; 1.90)         |
| <b>Frequency of agitation, sadness or anxiety due to the physical distance measures (ref. Never)</b> |              |                      |               |                       |              |                      |
| Some days                                                                                            | 0.85         | (0.66; 1.09)         | <b>0.55</b>   | <b>(0.36; 0.86)</b>   | <b>0.65</b>  | <b>(0.43; 0.99)</b>  |
| Almost every day                                                                                     | 0.90         | (0.65; 1.25)         | 0.96          | (0.57; 1.62)          | 1.07         | (0.65; 1.76)         |
| Every day                                                                                            | 0.91         | (0.59; 1.40)         | <b>1.96</b>   | <b>(1.09; 3.52)</b>   | <b>2.15</b>  | <b>(1.24; 3.72)</b>  |
| <b>Confidence in the COVID-19 vaccines that are being developed (ref. Very confident/Confident)</b>  | <b>10.84</b> | <b>(8.21; 14.32)</b> | <b>122.85</b> | <b>(64.94; 232.4)</b> | <b>11.34</b> | <b>(6.23; 20.63)</b> |
| <b>Time (ref. After)</b>                                                                             | <b>2.05</b>  | <b>(1.68; 2.50)</b>  | <b>4.69</b>   | <b>(3.21; 6.86)</b>   | <b>2.36</b>  | <b>(1.64; 3.39)</b>  |

**Table S5.** Crude odds of delay and refusal for the determinants of vaccine hesitancy for individuals without education or with basic or secondary education. OR: odds-ratio, CI: confidence interval.

|                                                                                                    | Wait vs Yes |                     | No vs Yes    |                       | No vs Wait   |                       |
|----------------------------------------------------------------------------------------------------|-------------|---------------------|--------------|-----------------------|--------------|-----------------------|
|                                                                                                    | OR          | 95% CI              | OR           | 95% CI                | OR           | 95% CI                |
| <b>Gender (ref. Male)</b>                                                                          | 0.97        | (0.63; 1.49)        | <b>0.53</b>  | <b>(0.28; 0.98)</b>   | <b>0.55</b>  | <b>(0.30; 0.98)</b>   |
| <b>Age (in years)</b>                                                                              | 0.99        | (0.98; 1.01)        | 0.98         | (0.96; 1.00)          | 0.99         | (0.97; 1.01)          |
| <b>Monthly household income (ref. &lt;650€)</b>                                                    |             |                     |              |                       |              |                       |
| 651-1000€                                                                                          | <b>0.43</b> | <b>(0.18; 0.99)</b> | <b>0.2</b>   | <b>(0.05; 0.72)</b>   | 0.47         | (0.15; 1.45)          |
| 1001-1500€                                                                                         | 0.48        | (0.21; 1.13)        | 0.51         | (0.16; 1.58)          | 1.05         | (0.41; 2.73)          |
| 1501-2000€                                                                                         | <b>0.26</b> | <b>(0.11; 0.62)</b> | 0.44         | (0.14; 1.39)          | 1.69         | (0.61; 4.65)          |
| 2001-2500€                                                                                         | 0.68        | (0.24; 1.89)        | 0.11         | (0.01; 1.08)          | 0.17         | (0.02; 1.41)          |
| > 2501€                                                                                            | <b>0.17</b> | <b>(0.06; 0.47)</b> | <b>0.12</b>  | <b>(0.02; 0.68)</b>   | 0.69         | (0.13; 3.69)          |
| <b>Lost of income due to the pandemic (ref. No)</b>                                                | 1.24        | (0.81; 1.90)        | 1.73         | (0.92; 3.28)          | 1.40         | (0.77; 2.54)          |
| <b>Occupation (ref. Worker)</b>                                                                    |             |                     |              |                       |              |                       |
| Student                                                                                            | 0.97        | (0.46; 2.02)        | 0.77         | (0.23; 2.49)          | 0.79         | (0.26; 2.44)          |
| Unemployed                                                                                         | 1.44        | (0.66; 3.13)        | 1.99         | (0.73; 5.42)          | 1.38         | (0.58; 3.32)          |
| Retired                                                                                            | 0.78        | (0.43; 1.42)        | <b>0.11</b>  | <b>(0.01; 0.83)</b>   | 0.14         | (0.02; 1.05)          |
| Other                                                                                              | 0.90        | (0.39; 2.08)        | 1.24         | (0.40; 3.87)          | 1.38         | (0.47; 4.04)          |
| <b>Intention of taking the flu vaccine this year (ref. Yes, I take the flu vaccine every year)</b> |             |                     |              |                       |              |                       |
| Yes, I will take the flu vaccine this year                                                         | 0.89        | (0.48; 1.63)        | 2.13         | (0.13; 35.19)         | 2.39         | (0.14; 39.61)         |
| No                                                                                                 | <b>3.04</b> | <b>(1.92; 4.83)</b> | <b>72.07</b> | <b>(9.63; 539.10)</b> | <b>23.62</b> | <b>(3.20; 174.26)</b> |
| <b>Perception of the health status (ref. Very good/Good)</b>                                       |             |                     |              |                       |              |                       |
| Reasonable                                                                                         | 0.78        | (0.51; 1.18)        | <b>0.51</b>  | <b>(0.27; 0.97)</b>   | 0.66         | (0.36; 1.20)          |
| Bad/Very bad                                                                                       | <b>0.41</b> | <b>(0.19; 0.90)</b> | <b>0.11</b>  | <b>(0.01; 0.88)</b>   | 0.27         | (0.03; 2.17)          |

|                                                                                                               | Wait vs Yes |                     | No vs Yes    |                      | No vs Wait   |                      |
|---------------------------------------------------------------------------------------------------------------|-------------|---------------------|--------------|----------------------|--------------|----------------------|
| <b>Respiratory disease</b> (ref. No)                                                                          | 0.95        | (0.55; 1.64)        | 0.84         | (0.36; 2.00)         | 0.89         | (0.39; 2.03)         |
| <b>Autoimmune disease</b> (ref. No)                                                                           | <b>0.44</b> | <b>(0.23; 0.84)</b> | <b>0.10</b>  | <b>(0.01; 0.73)</b>  | 0.22         | (0.03; 1.67)         |
| <b>Number of comorbidities</b> (ref. 0)                                                                       |             |                     |              |                      |              |                      |
| 1                                                                                                             | 1.08        | (0.69; 1.71)        | 0.63         | (0.31; 1.28)         | 0.58         | (0.30; 1.13)         |
| ≥2                                                                                                            | 0.91        | (0.51; 1.61)        | <b>0.23</b>  | <b>(0.07; 0.82)</b>  | <b>0.26</b>  | <b>(0.08; 0.88)</b>  |
| <b>Have school-age children</b> (ref. No)                                                                     | 0.99        | (0.65; 1.49)        | 1.63         | (0.88; 3.04)         | 1.66         | (0.92; 2.98)         |
| <b>Confidence in the health services capacity to respond to the pandemic</b> (ref. Very confident)            |             |                     |              |                      |              |                      |
| Confident                                                                                                     | 0.85        | (0.41; 1.74)        | 0.46         | (0.14; 1.46)         | 0.54         | (0.18; 1.61)         |
| Not very confident                                                                                            | 0.94        | (0.43; 2.06)        | 0.68         | (0.20; 2.38)         | 0.72         | (0.23; 2.33)         |
| Not confident                                                                                                 | 0.40        | (0.12; 1.33)        | <b>6.07</b>  | <b>(1.66; 22.12)</b> | <b>15.00</b> | <b>(4.15; 54.27)</b> |
| <b>View on the information provided by the health authorities</b> (ref. Clear and understandable)             |             |                     |              |                      |              |                      |
| Unclear and confusing                                                                                         | 1.31        | (0.63; 2.72)        | <b>7.69</b>  | <b>(1.82; 32.45)</b> | <b>5.89</b>  | <b>(1.47; 23.57)</b> |
| Inconsistent and contradictory                                                                                | 1.45        | (0.80; 2.63)        | <b>12.38</b> | <b>(3.66; 41.92)</b> | <b>8.54</b>  | <b>(2.64; 27.66)</b> |
| <b>Perception of the adequacy of the measures implemented by the Government</b> (ref. Very adequate/adequate) |             |                     |              |                      |              |                      |
| Not very adequate/Not adequate                                                                                | 1.29        | (0.85; 1.95)        | <b>15.83</b> | <b>(5.96; 42.02)</b> | <b>12.26</b> | <b>(4.74; 31.72)</b> |
| <b>Self-Perceived Risk to get COVID-19 Infection</b> (ref. High)                                              |             |                     |              |                      |              |                      |
| Moderate                                                                                                      | <b>1.69</b> | <b>(1.02; 2.80)</b> | 1.02         | (0.42; 2.52)         | 0.61         | (0.25; 1.46)         |
| Low/No risk                                                                                                   | <b>2.09</b> | <b>(1.11; 3.95)</b> | <b>5.83</b>  | <b>(2.38; 14.32)</b> | <b>2.79</b>  | <b>(1.20; 6.47)</b>  |
| Not sure                                                                                                      | 1.04        | (0.45; 2.39)        | 0.67         | (0.13; 3.46)         | 0.64         | (0.12; 3.27)         |
| <b>Self-Perceived Risk to Develop Severe Disease Following COVID-19 Infection</b> (ref. High)                 |             |                     |              |                      |              |                      |
| Moderate                                                                                                      | <b>1.72</b> | <b>(1.03; 2.85)</b> | 1.94         | (0.61; 6.16)         | 1.13         | (0.36; 3.55)         |
| Low/No risk                                                                                                   | <b>2.75</b> | <b>(1.56; 4.86)</b> | <b>15.45</b> | <b>(5.50; 43.37)</b> | <b>5.61</b>  | <b>(2.08; 15.14)</b> |
| Not sure                                                                                                      | <b>2.35</b> | <b>(1.15; 4.80)</b> | 2.24         | (0.48; 10.45)        | 0.95         | (0.21; 4.25)         |

| Frequency of agitation, sadness or anxiety due to the physical distance measures (ref. Never)       | Wait vs Yes |                      | No vs Yes     |                        | No vs Wait   |                      |
|-----------------------------------------------------------------------------------------------------|-------------|----------------------|---------------|------------------------|--------------|----------------------|
|                                                                                                     | OR          | 95% CI               | OR            | 95% CI                 | OR           | 95% CI               |
| Some days                                                                                           | 0.73        | (0.43; 1.24)         | 0.41          | (0.19; 0.89)           | 0.56         | (0.28; 1.16)         |
| Almost every day                                                                                    | 1.08        | (0.53; 2.22)         | 0.83          | (0.30; 2.26)           | 0.76         | (0.31; 1.91)         |
| Every day                                                                                           | 1.18        | (0.53; 2.62)         | 1.08          | (0.37; 3.15)           | 0.91         | (0.35; 2.39)         |
| <b>Confidence in the COVID-19 vaccines that are being developed</b> (ref. Very confident/Confident) | <b>7.04</b> | <b>(4.19; 11.81)</b> | <b>159.55</b> | <b>(36.25; 702.21)</b> | <b>22.67</b> | <b>(5.40; 95.11)</b> |
| <b>Period of questionnaire</b> (ref. After)                                                         | <b>1.73</b> | <b>(1.15; 2.61)</b>  | <b>7.29</b>   | <b>(3.42; 15.52)</b>   | <b>4.21</b>  | <b>(2.03; 8.69)</b>  |

**Table S6.** Crude odds of delay and refusal for the determinants of vaccine hesitancy for individuals with an university degree. OR: odds-ratio, CI: confidence interval.

|                                                                                                    | Wait vs Yes |                     | No vs Yes    |                      | No vs Wait  |                      |
|----------------------------------------------------------------------------------------------------|-------------|---------------------|--------------|----------------------|-------------|----------------------|
|                                                                                                    | OR          | 95% CI              | OR           | 95% CI               | OR          | 95% CI               |
| <b>Gender</b> (ref. Male)                                                                          | <b>1.59</b> | <b>(1.25; 2.03)</b> | 1.04         | (0.68; 1.59)         | <b>0.65</b> | <b>(0.43; 0.99)</b>  |
| <b>Age (in years)</b>                                                                              | <b>0.98</b> | <b>(0.97; 0.99)</b> | 0.98         | (0.96; 1.00)         | 1.00        | (0.98; 1.01)         |
| <b>Monthly household income</b> (ref. <650€)                                                       |             |                     |              |                      |             |                      |
| 651-1000€                                                                                          | <b>2.17</b> | <b>(1.05; 4.48)</b> | 1.80         | (0.44; 7.40)         | 0.83        | (0.21; 3.34)         |
| 1001-1500€                                                                                         | 1.55        | (0.81; 2.99)        | 1.49         | (0.41; 5.45)         | 0.96        | (0.27; 3.50)         |
| 1501-2000€                                                                                         | 1.88        | (0.97; 3.66)        | 1.38         | (0.37; 5.22)         | 0.73        | (0.20; 2.75)         |
| 2001-2500€                                                                                         | 1.80        | (0.92; 3.51)        | 2.24         | (0.61; 8.16)         | 1.25        | (0.34; 4.50)         |
| > 2501€                                                                                            | 1.16        | (0.62; 2.20)        | 1.04         | (0.29; 3.72)         | 0.90        | (0.25; 3.20)         |
| <b>Lost of income due to the pandemic</b> (ref. No)                                                | <b>1.33</b> | <b>(1.05; 1.70)</b> | <b>2.13</b>  | <b>(1.41; 3.21)</b>  | <b>1.60</b> | <b>(1.08; 2.36)</b>  |
| <b>Occupation</b> (ref. Worker)                                                                    |             |                     |              |                      |             |                      |
| Student                                                                                            | 0.67        | (0.39; 1.14)        | 0.59         | (0.20; 1.72)         | 0.88        | (0.30; 2.55)         |
| Unemployed                                                                                         | 0.99        | (0.54; 1.84)        | 1.41         | (0.54; 3.65)         | 1.42        | (0.57; 3.50)         |
| Retired                                                                                            | <b>0.40</b> | <b>(0.25; 0.63)</b> | <b>0.16</b>  | <b>(0.04; 0.66)</b>  | 0.40        | (0.09; 1.69)         |
| Other                                                                                              | 1.13        | (0.62; 2.07)        | 0.70         | (0.20; 2.44)         | 0.62        | (0.19; 2.06)         |
| <b>Intention of taking the flu vaccine this year</b> (ref. Yes, I take the flu vaccine every year) |             |                     |              |                      |             |                      |
| Yes, I will take the flu vaccine this year                                                         | <b>1.79</b> | <b>(1.31; 2.46)</b> | 0.98         | (0.29; 3.33)         | 0.55        | (0.16; 1.85)         |
| No                                                                                                 | <b>2.24</b> | <b>(1.73; 2.89)</b> | <b>12.69</b> | <b>(6.04; 26.68)</b> | <b>5.67</b> | <b>(2.71; 11.85)</b> |
| <b>Perception of the health status</b> (ref. Very good/Good)                                       |             |                     |              |                      |             |                      |
| Reasonable                                                                                         | 0.99        | (0.79; 1.25)        | <b>0.51</b>  | <b>(0.32; 0.82)</b>  | <b>0.52</b> | <b>(0.33; 0.81)</b>  |
| Bad/Very bad                                                                                       | 0.69        | (0.33; 1.44)        | 0.26         | (0.03; 1.97)         | 0.37        | (0.05; 2.86)         |

|                                                                                                               | Wait vs Yes |                     | No vs Yes   |                      | No vs Wait  |                     |
|---------------------------------------------------------------------------------------------------------------|-------------|---------------------|-------------|----------------------|-------------|---------------------|
| <b>Respiratory disease</b> (ref. No)                                                                          | 1.26        | (0.93; 1.70)        | 1.10        | (0.63; 1.92)         | 0.87        | (0.51; 1.49)        |
| <b>Autoimmune disease</b> (ref. No)                                                                           | 1.05        | (0.73; 1.51)        | 0.47        | (0.20; 1.13)         | 0.45        | (0.19; 1.05)        |
| <b>Number of comorbidities</b> (ref. 0)                                                                       |             |                     |             |                      |             |                     |
| 1                                                                                                             | 0.81        | (0.63; 1.04)        | <b>0.55</b> | <b>(0.34; 0.87)</b>  | 0.67        | (0.43; 1.06)        |
| ≥2                                                                                                            | 0.83        | (0.60; 1.15)        | <b>0.22</b> | <b>(0.08; 0.55)</b>  | <b>0.26</b> | <b>(0.10; 0.65)</b> |
| <b>Have school-age children</b> (ref. No)                                                                     | 1.06        | (0.85; 1.32)        | <b>2.14</b> | <b>(1.43; 3.20)</b>  | <b>2.03</b> | <b>(1.37; 2.99)</b> |
| <b>Confidence in the health services capacity to respond to the pandemic</b> (ref. Very confident)            |             |                     |             |                      |             |                     |
| Confident                                                                                                     | <b>1.58</b> | <b>(1.04; 2.42)</b> | <b>0.48</b> | <b>(0.23; 0.98)</b>  | <b>0.30</b> | <b>(0.15; 0.62)</b> |
| Not very confident                                                                                            | <b>2.29</b> | <b>(1.46; 3.60)</b> | 1.12        | (0.54; 2.33)         | 0.49        | (0.24; 1.01)        |
| Not confident                                                                                                 | <b>3.02</b> | <b>(1.48; 6.19)</b> | <b>9.63</b> | <b>(4.02; 23.1)</b>  | <b>3.19</b> | <b>(1.46; 6.98)</b> |
| <b>View on the information provided by the health authorities</b> (ref. Clear and understandable)             |             |                     |             |                      |             |                     |
| Unclear and confusing                                                                                         | 1.26        | (0.91; 1.73)        | 1.48        | (0.58; 3.78)         | 1.17        | (0.46; 2.98)        |
| Inconsistent and contradictory                                                                                | <b>1.63</b> | <b>(1.20; 2.22)</b> | <b>7.81</b> | <b>(4.03; 15.14)</b> | <b>4.80</b> | <b>(2.52; 9.12)</b> |
| <b>Perception of the adequacy of the measures implemented by the Government</b> (ref. Very adequate/adequate) |             |                     |             |                      |             |                     |
| Not very adequate/Not adequate                                                                                | <b>1.50</b> | <b>(1.20; 1.88)</b> | <b>7.72</b> | <b>(4.71; 12.67)</b> | <b>5.16</b> | <b>(3.18; 8.36)</b> |
| <b>Self-Perceived Risk to get COVID-19 Infection</b> (ref. High)                                              |             |                     |             |                      |             |                     |
| Moderate                                                                                                      | <b>0.68</b> | <b>(0.51; 0.91)</b> | <b>0.44</b> | <b>(0.27; 0.72)</b>  | 0.65        | (0.40; 1.04)        |
| Low/No risk                                                                                                   | 0.72        | (0.50; 1.02)        | 0.92        | (0.53; 1.59)         | 1.28        | (0.76; 2.15)        |
| Not sure                                                                                                      | 1.08        | (0.55; 2.12)        | 0.20        | (0.02; 1.56)         | 0.18        | (0.02; 1.39)        |
| <b>Self-Perceived Risk to Develop Severe Disease Following COVID-19 Infection</b> (ref. High)                 |             |                     |             |                      |             |                     |
| Moderate                                                                                                      | 1.19        | (0.87; 1.64)        | 1.58        | (0.68; 3.64)         | 1.32        | (0.58; 3.02)        |
| Low/No risk                                                                                                   | 1.20        | (0.88; 1.64)        | <b>5.38</b> | <b>(2.51; 11.53)</b> | <b>4.48</b> | <b>(2.11; 9.51)</b> |
| Not sure                                                                                                      | 1.52        | (0.97; 2.38)        | 0.87        | (0.22; 3.45)         | 0.57        | (0.15; 2.22)        |

|                                                                                                      | Wait vs Yes  |                      | No vs Yes     |                        | No vs Wait  |                      |
|------------------------------------------------------------------------------------------------------|--------------|----------------------|---------------|------------------------|-------------|----------------------|
| <b>Frequency of agitation, sadness or anxiety due to the physical distance measures</b> (ref. Never) |              |                      |               |                        |             |                      |
| Some days                                                                                            | 0.88         | (0.66; 1.18)         | 0.65          | (0.38; 1.12)           | 0.74        | (0.44; 1.25)         |
| Almost every day                                                                                     | 0.86         | (0.59; 1.24)         | 1.11          | (0.59; 2.10)           | 1.30        | (0.70; 2.39)         |
| Every day                                                                                            | 0.77         | (0.46; 1.29)         | <b>2.57</b>   | <b>(1.26; 5.25)</b>    | <b>3.34</b> | <b>(1.69; 6.59)</b>  |
| <b>Confidence in the COVID-19 vaccines that are being developed</b> (ref. Very confident/Confident)  | <b>12.63</b> | <b>(9.06; 17.62)</b> | <b>114.92</b> | <b>(56.24; 234.86)</b> | <b>9.10</b> | <b>(4.69; 17.64)</b> |
| <b>Period of questionnaire</b> (ref. After)                                                          | <b>2.12</b>  | <b>(1.70; 2.65)</b>  | <b>4.04</b>   | <b>(2.61; 6.25)</b>    | <b>1.91</b> | <b>(1.25; 2.91)</b>  |
